# Supplementary material for: A highly sensitive fluorescent probe for bioimaging zinc ion in living cells and zebrafish models
Source: Royal Society of Chemistry journal article supplement (doi:10.1039/c8nj02197j), 2018-01-01
Supplement: c8nj02197j1.pdf [file c8nj02197j1.pdf]

## Supporting Information

# A Highly sensitive fluorescent probe for bioimaging Zinc Ion in Living Cells and Zebrafish Models

Zhengliang Lu,<sup>\*,a</sup> Wenlong Fan,<sup>a</sup> Yanan Lu,<sup>a</sup> Chunhua Fan,<sup>\*,a</sup> Huaiqing Zhao,<sup>a</sup> Kai Guo,<sup>a</sup> Wei Chu,<sup>a</sup> Yizhong Lu<sup>\*,b</sup>

<sup>a</sup> Key Laboratory of Interfacial Reaction & Sensing Analysis in Universities of Shandong, School of Chemistry and Chemical Engineering, University of Jinan, Jinan 250022, China.

<sup>b</sup> School of Materials Science and Engineering, University of Jinan, Jinan 250022, China.

Corresponding author's fax: +86-531-82765475

Corresponding email: [zhengliang.lu@yahoo.com](mailto:zhengliang.lu@yahoo.com), [chm\\_fanch@ujn.edu.cn](mailto:chm_fanch@ujn.edu.cn), [mse\\_luyz@ujn.edu.cn](mailto:mse_luyz@ujn.edu.cn)

## Contents

|                                                                                                                 |    |
|-----------------------------------------------------------------------------------------------------------------|----|
| Figure S1 <sup>1</sup> H NMR of 5-phenylsalicylaldehyde in CDCl <sub>3</sub> .....                              | S2 |
| Figure S2 <sup>13</sup> C NMR of 5-phenylsalicylaldehyde in CDCl <sub>3</sub> .....                             | S2 |
| Figure S3 <sup>1</sup> H NMR of <b>Sen-OH</b> in Acetone- <i>d</i> <sub>6</sub> .....                           | S3 |
| Figure S4 <sup>13</sup> C NMR of <b>Sen-OH</b> in Acetone- <i>d</i> <sub>6</sub> .....                          | S3 |
| Figure S5 ESI-HRMS of <b>Sen-OH</b> .....                                                                       | S4 |
| Figure S6 Job's plot for <b>Sen-OH</b> and Zn <sup>2+</sup> .....                                               | S4 |
| Figure S7 Reversibility of <b>Sen-OH</b> with Zn <sup>2+</sup> and EDTA.....                                    | S5 |
| Figure S8 Time dependent fluorescence changes of <b>Sen-OH</b> with Zn <sup>2+</sup> .....                      | S5 |
| Figure S9 Photostability of <b>Sen-OH</b> with or without a 365 nm UV light.....                                | S6 |
| Figure S10 pH effect of <b>Sen-OH</b> sensing Zn <sup>2+</sup> .....                                            | S6 |
| Scheme S1 Proposed mechanism of <b>Sen-OH</b> sensing Zn <sup>2+</sup> .....                                    | S6 |
| Figure S11 HRMS spectrum of <b>Sen-OH</b> +Zn <sup>2+</sup> .....                                               | S7 |
| Figure S12 Fluorescence responses of <b>Ref-OH-NH2</b> and <b>Ref-OH</b> with or without Zn <sup>2+</sup> ..... | S7 |
| Figure S13 MTT assays of <b>Sen-OH</b> with HeLa cells.....                                                     | S8 |

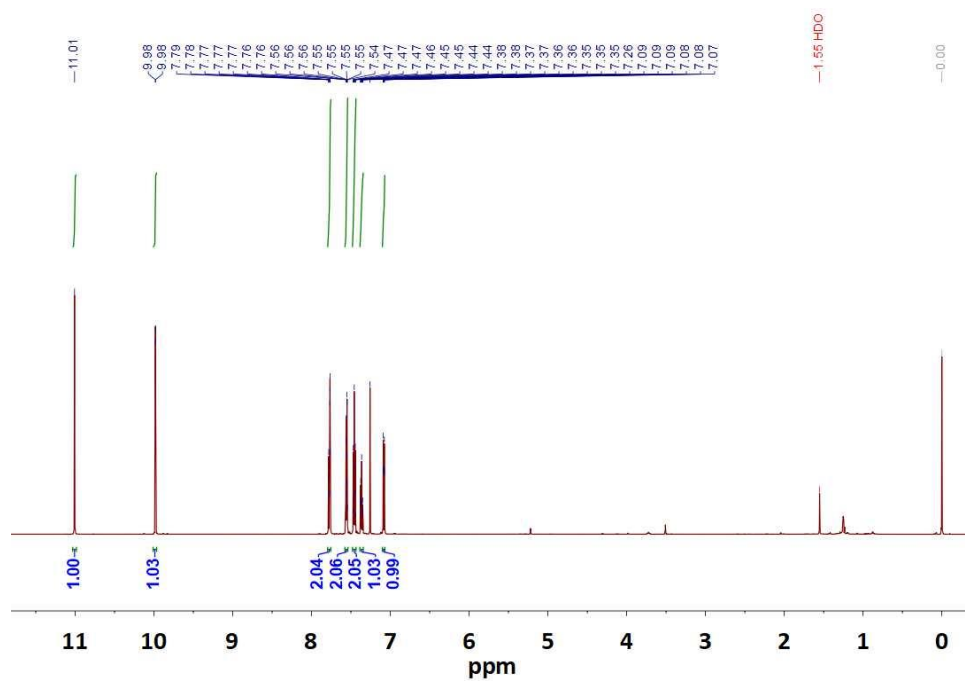

**Figure S1.** <sup>1</sup>H NMR of 5-phenylsalicylaldehyde in CDCl<sub>3</sub>.

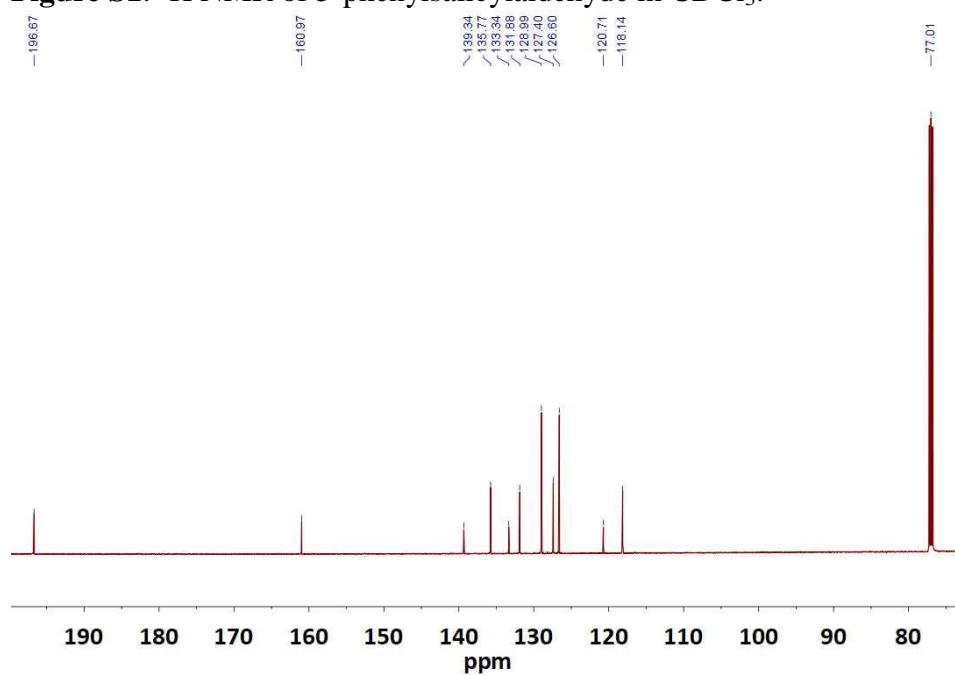

**Figure S2.** <sup>13</sup>C NMR of 5-phenylsalicylaldehyde in CDCl<sub>3</sub>.

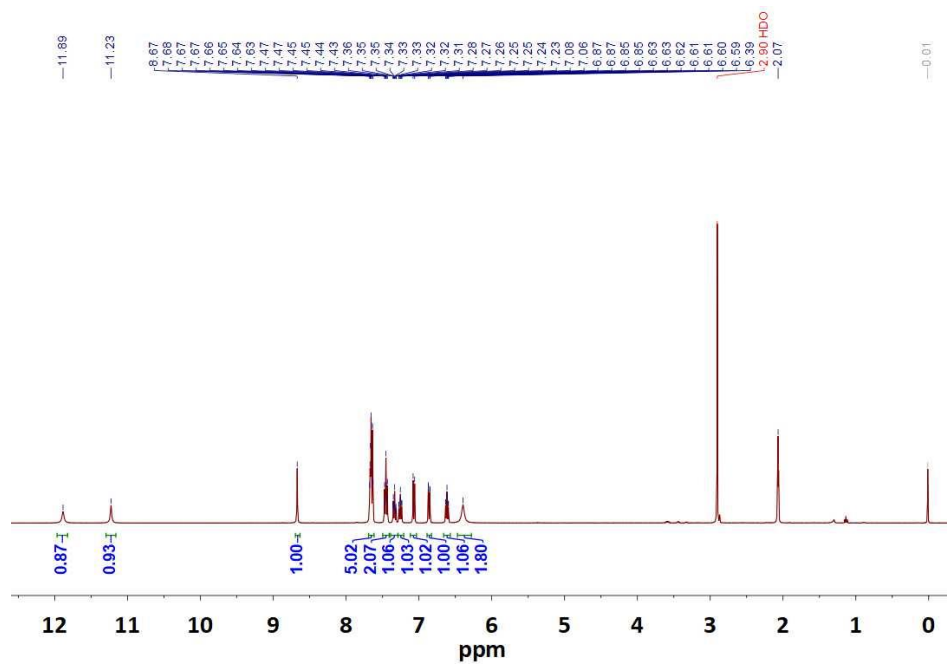

Figure S3.  $^1\text{H}$  NMR of Sen-OH in Acetone- $d_6$ .

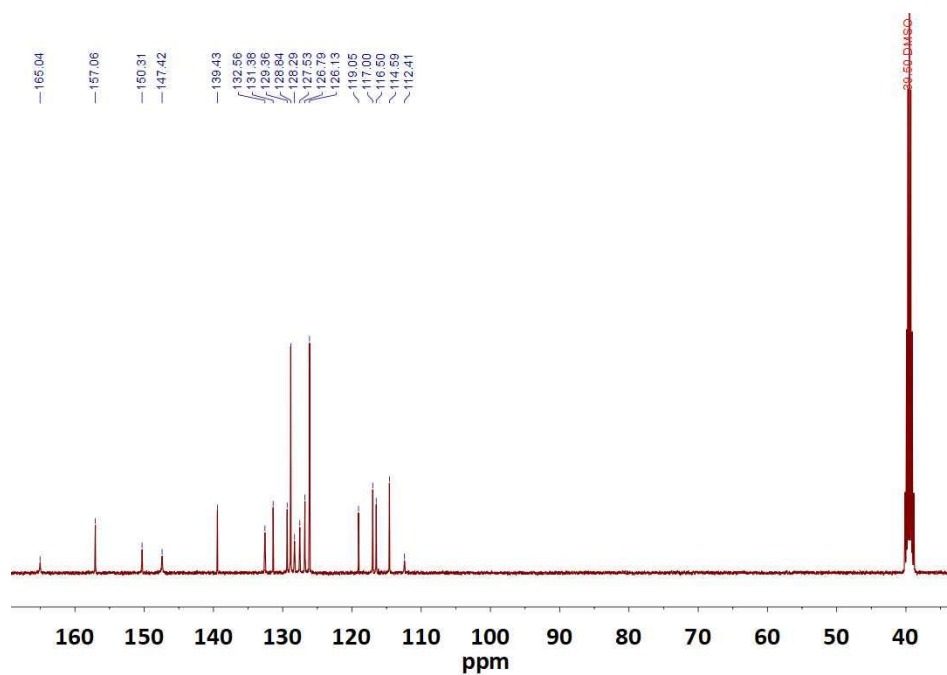

Figure S4.  $^{13}\text{C}$  NMR of Sen-OH in Acetone- $d_6$ .

**Analysis Info**

Analysis Name D:\Data\ESI\2017\2017-06\0602\ID10\_000001.d  
Sample Name D10

Acquisition Date 6/2/2017 11:15:45 AM

Operator  
Instrument solariX

**Acquisition Parameter**

Polarity Negative  
Broadband Low Mass 57.7 m/z  
Broadband High Mass 1000.0 m/z

Calibration Date Fri Jun 2 09:14:23 2017

Acquired Scans 10

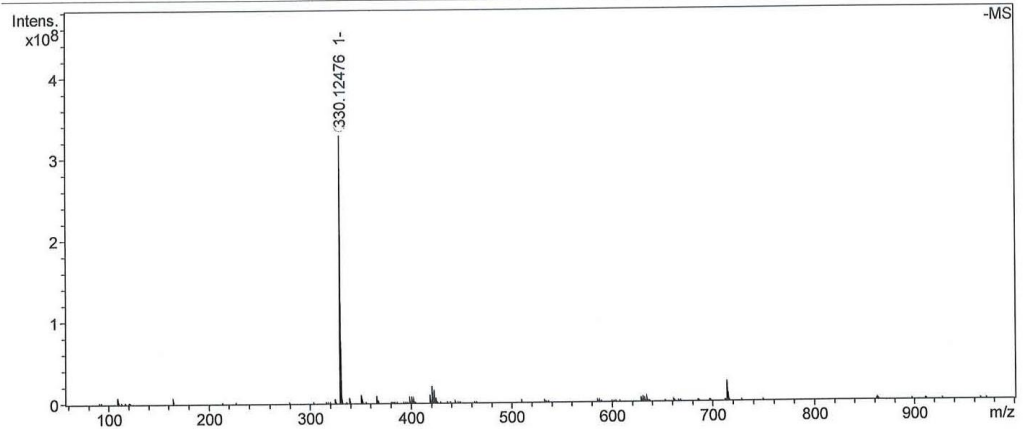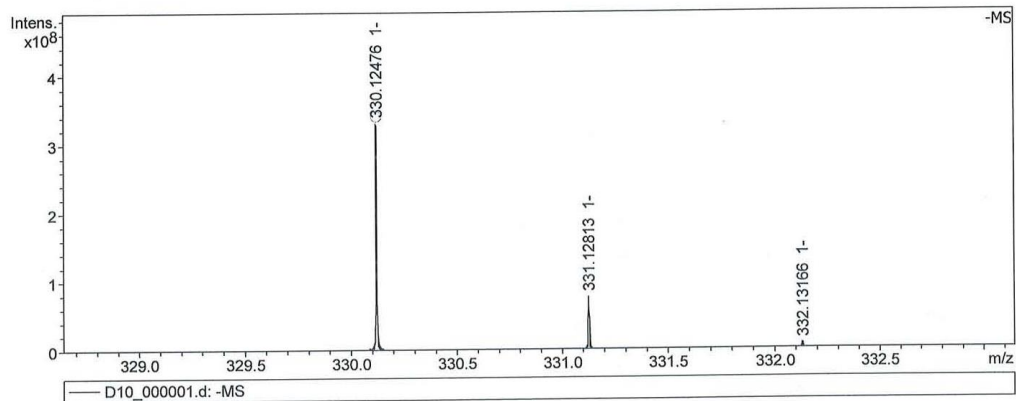

| Meas. m/z  | # | Ion Formula | Score  | m/z        | err [ppm] | Mean err [ppm] | mSigma | rdb  | e <sup>-</sup> Conf | N-Rule |
|------------|---|-------------|--------|------------|-----------|----------------|--------|------|---------------------|--------|
| 330.124758 | 1 | C20H16N3O2  | 100.00 | 330.124800 | -0.1      | -0.1           | 3.4    | 14.5 | even                | ok     |

**Figure S5. ESI-HRMS of Sen-OH.**

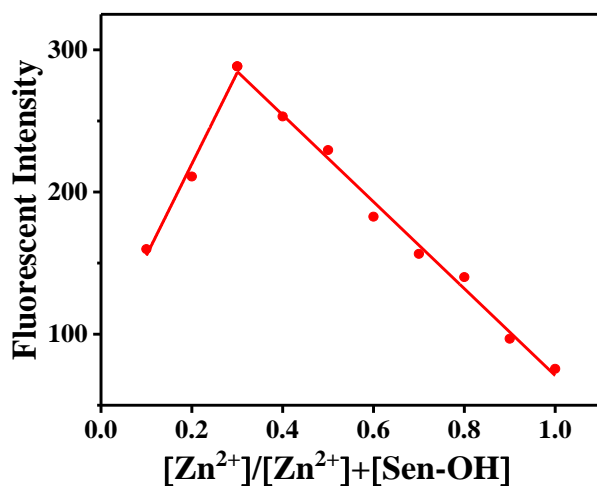

**Figure S6.** Job's plot for determining the stoichiometry of **Sen-OH** and  $Zn^{2+}$  in  $CH_3CN$  aqueous solution (HEPES 10 mM, pH 7.4).

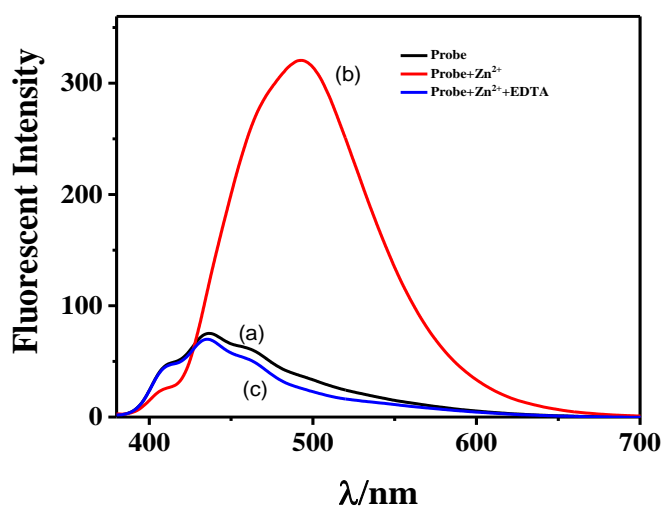

**Figure S7.** Reversibility of fluorescence intensity at 485 nm of (a) **Sen-OH** (10  $\mu M$ ), (b) **Sen-OH** (10  $\mu M$ ) with  $Zn^{2+}$  (70  $\mu M$ ), and (c) **Sen-OH** (10  $\mu M$ ) with  $Zn^{2+}$  (70  $\mu M$ ) and then with addition of EDTA (140  $\mu M$ ).

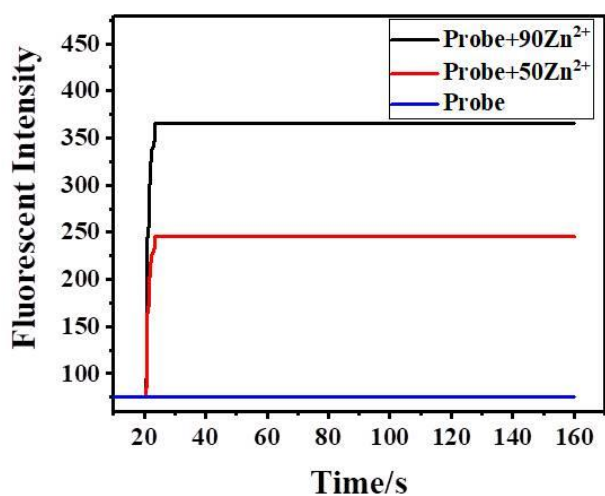

**Figure S8.** Time-dependent fluorescence changes of **Sen-OH** ( $10 \mu\text{M}$ ) at  $485 \text{ nm}$  upon addition of  $\text{Zn}^{2+}$  ( $0, 20,$  and  $60 \mu\text{M}$ ) in  $\text{CH}_3\text{CN}$  aqueous solution (HEPES  $20 \text{ mM}$ ,  $\text{pH } 7.4$ ).

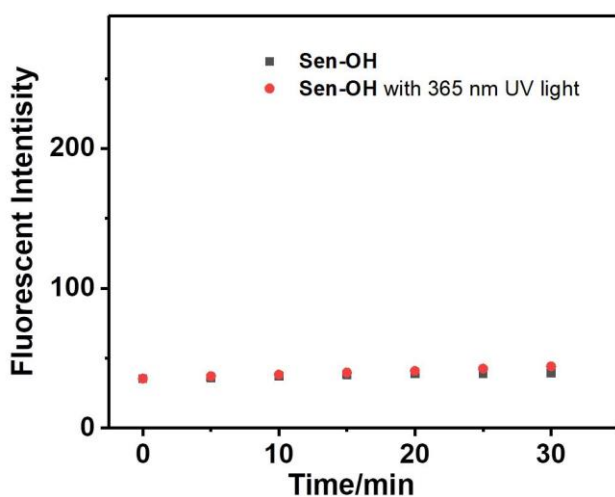

**Figure S9.** Photostability profiles of the **Sen-OH** ( $10 \mu\text{M}$ ) in the absence or presence of UV-irradiation at  $365 \text{ nm}$ . The fluorescence intensities at  $485 \text{ nm}$  were continuously monitored from  $0$  to  $30$  minutes for every five minutes in  $\text{CH}_3\text{CN}$  aqueous solution ( $3:7, \text{v/v}$ , HEPES  $20 \text{ mM}$ ,  $\text{pH } 7.4$ ).

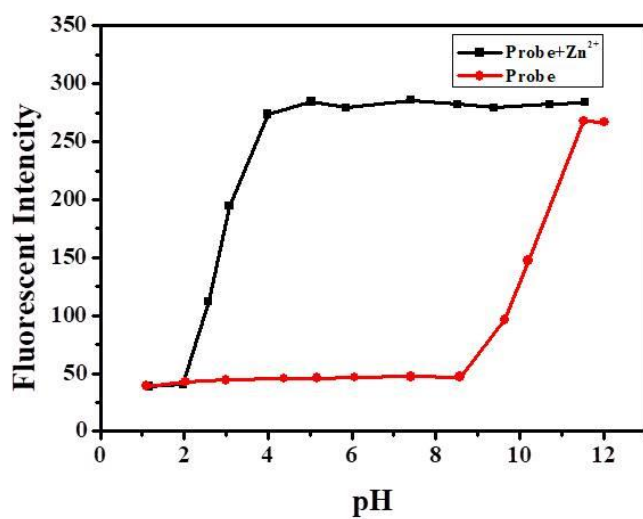

**Figure S10.** Fluorescence responses at 485 nm of **Sen-OH** ( $5 \mu\text{M}$ ) toward different pH values in the presence and absence of  $\text{Zn}^{2+}$  ( $60 \mu\text{M}$ ) in  $\text{CH}_3\text{CN}$  aqueous solution at  $25 \text{ }^\circ\text{C}$ .  $\lambda_{\text{ex}} = 360 \text{ nm}$ .

**Scheme S1.** The proposed mechanism of **Sen-OH** with  $\text{Zn}^{2+}$  and structural transformation in different solvents.

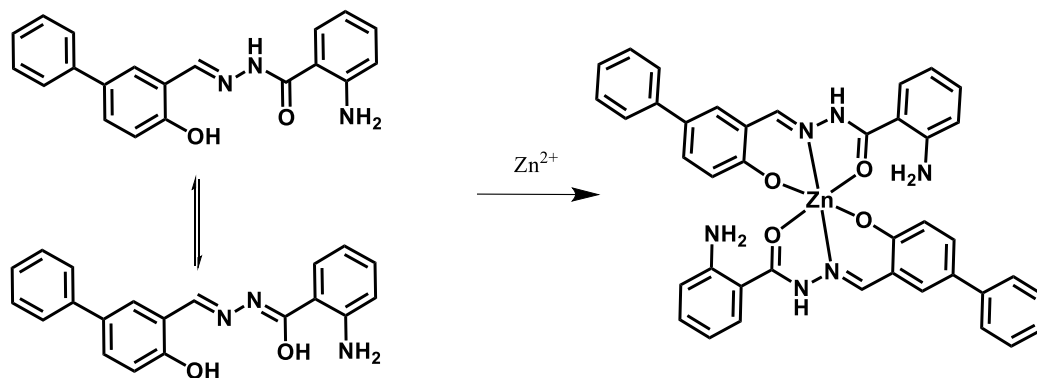

# ESI(P),D10-Zn,20170602

**Analysis Info**  
 Analysis Name D:\Data\ESI\2017\2017-06\0602\D10-Zn\_000002.d Acquisition Date 6/2/2017 11:27:36 AM  
 Sample Name D10-Zn Operator solarix  
 Instrument solarix

**Acquisition Parameter**  
 Polarity Positive Calibration Date Fri Jun 2 09:13:02 2017  
 Broadband Low Mass 57.7 m/z Acquired Scans 10  
 Broadband High Mass 1000.0 m/z

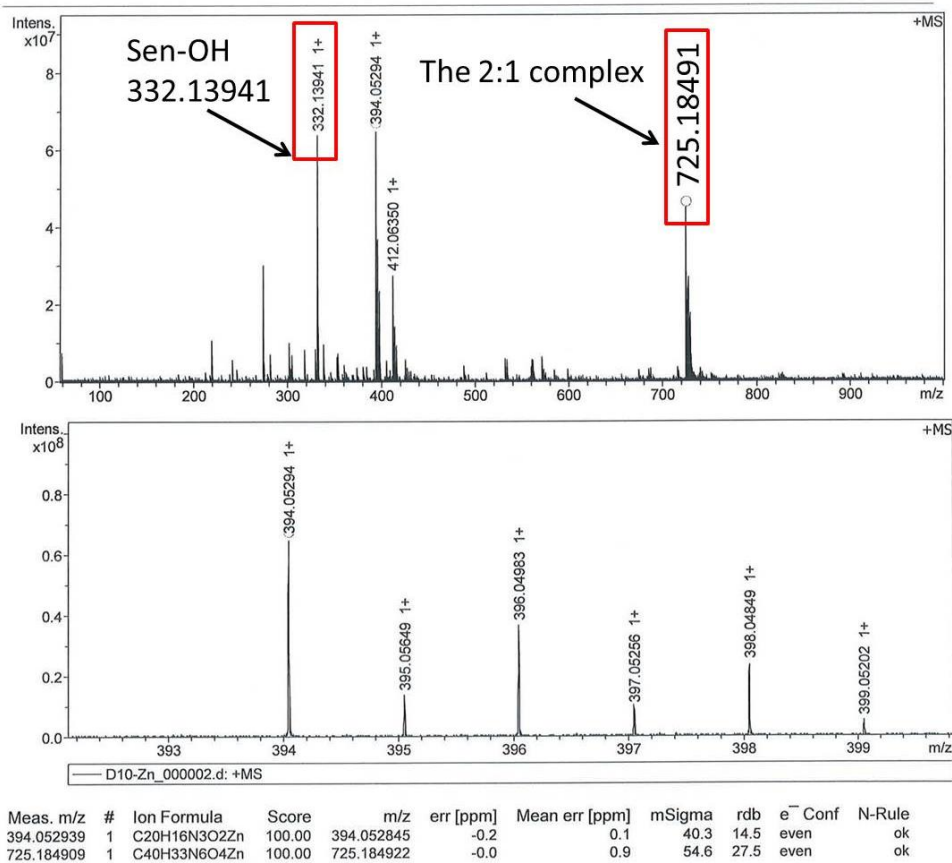

**Figure S11.** ESI-HRMS of Sen-OH-Zn<sup>2+</sup>.



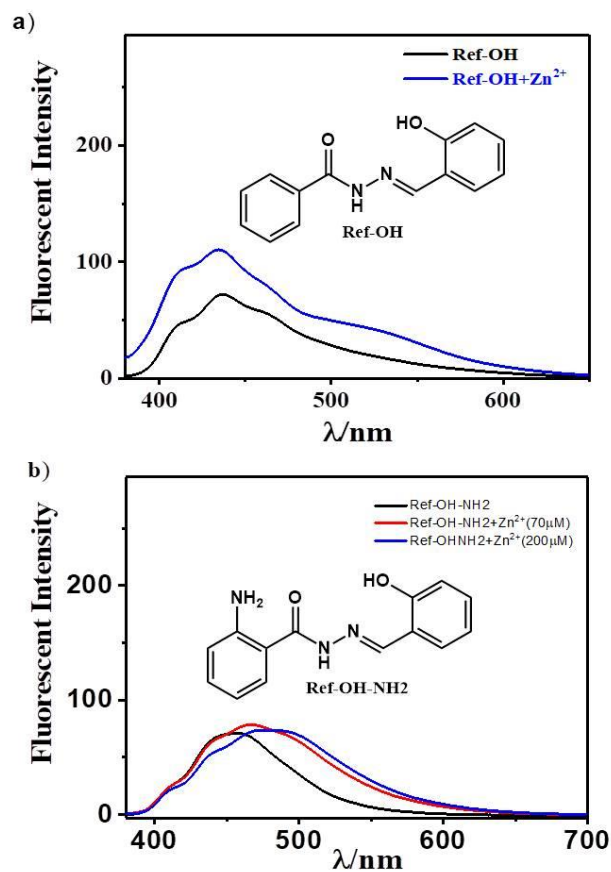

**Figure S12.** Fluorescence emission spectra of **Ref-OH** (10  $\mu$ M) (a) and **Ref-OH-NH<sub>2</sub>** (10  $\mu$ M) (b) with or without  $Zn^{2+}$  in  $CH_3CN$  aqueous solution (HEPES 10 mM, pH 7.4).  $\lambda_{ex} = 360$  nm.

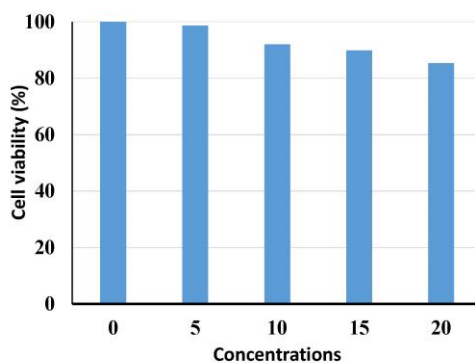

**Figure S13.** MTT assay of HeLa cells incubated with **Sen-OH** at different concentrations (0, 5, 10, 15, 20  $\mu$ M) for 24 hours.
